# Supplementary material
Source: publisher figshare collection journal article supplement (https://tandf.figshare.com/ndownloader/files/15248738)
Supplement: Supplementary file 1 [file 15248738]

Table A. Regression Analyses Without Interaction Terms

|  | Student Sample 1 (*n* = 335) | Student Sample 2 (*n* = 265) | Clinical Sample 1 (*ns* = 159 ~ 160) | Clinical Sample 2 (*n* = 153) |
| --- | --- | --- | --- | --- |
| **Outcome: Dysphoria** |  |  |  |  |
| Emotional Clarity | -.14* [-.24, -.04] | -.33*** [-.43, -.22] | -.38*** [-.49, -.26] | -.26*** [-.40, -.13] |
| Emotional Clarity2 | **.10*** [.01, .20] | -.03 [-.10, .05] | **.12*** [.01, .23] | .01 [-.11, .13] |
| Neuroticism/NA | .54*** [.45, .62] | .45*** [.34, .56] | .41*** [.30, .52] | .51*** [.41, .61] |
| Model *R*2 (SE) | .38 (.04)*** | .39 (.05)*** | .48 (.06)*** | .41 (.06)*** |
| **Outcome: Social Anxiety** |  |  |  |  |
| Emotional Clarity | -.22** [-0.35, -.09] | -.28*** [-.39, -.17] | -.30*** [-.46, -.14] | -.31*** [-.46, -.16] |
| Emotional Clarity2 | .10† [-.01, .21] | -.08† [-.17, .004] | .05 [-.09, .19] | -.09 [-.28, .10] |
| Neuroticism/NA | .31*** [.19, .42] | .33*** [.20, .46] | .33*** [.19, .47] | .31*** [.17, .44] |
| Model *R*2 (SE) | .21 (.04)*** | .24 (.05)*** | .30 (.06)*** | .23 (.06)*** |
| **Outcome: Panic** |  |  |  |  |
| Emotional Clarity | -.10 [-.23, .02] | -.27*** [-.38, -.15] | -.42*** [-.54, -.30] | -.20* [-.35, -.05] |
| Emotional Clarity2 | .07 [-.04, .18] | **-.09*** [-.17, -.01] | **.23***** [.11, .35] | -.02 [-.18, .14] |
| Neuroticism/NA | .28*** [.16, .40] | .35*** [.22, .47] | .19** [.07, .32] | .30** [.16, .45] |
| Model *R*2 (SE) | .12 (.03)*** | .25 (.04)*** | .38 (.07)*** | .16 (.05)** |
| **Outcome:** **Traumatic Intrusions** |  |  |  |  |
| Emotional Clarity | -.17** [-.29, -.05] | -.31*** [-.43, -.19] | -.37*** [-.50, -.23] | -.17* [-.34, -.000] |
| Emotional Clarity2 | .003 [-.10, .11] | .10 [-.03, .22] | .07 [-.05, .19] | -.07 [-.25, .12] |
| Neuroticism/NA | .37*** [.25, .48] | .32*** [.20, .44] | .23*** [.11, .36] | .28*** [.14, .42] |
| Model *R*2 (SE) | .22 (.04)*** | .28 (.05)*** | .28 (.07)*** | .13 (.05)* |

*Note*. NA = negative affect; Standardized estimates are presented with 95% confidence intervals in brackets.

† *p* < .07., * *p* < .05., ** *p* < .01., *** *p* < .001.
